# Supplementary material for: CCAT1/FABP5 promotes tumour progression through mediating fatty acid metabolism and stabilizing PI3K/AKT/mTOR signalling in lung adenocarcinoma
Source: PubMed Central journal article supplement (PMC8500980; doi:10.1111/jcmm.16815), 2021-08-25

A

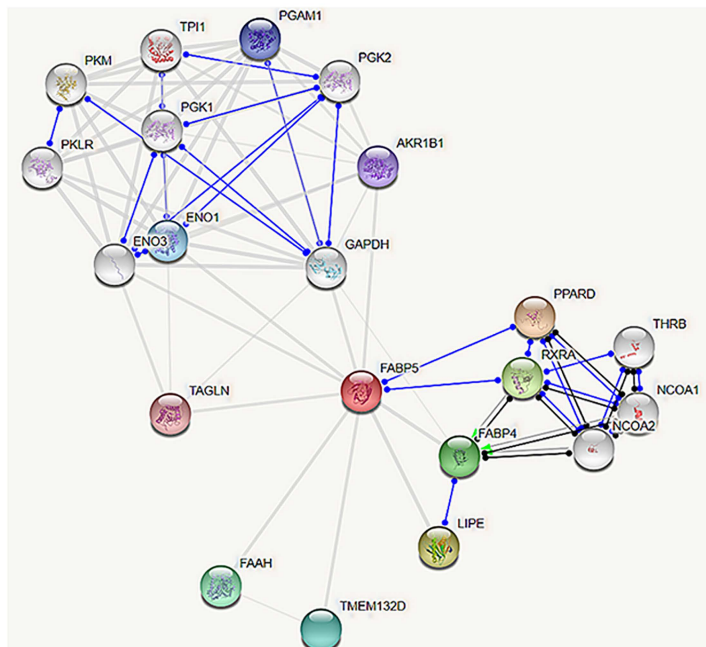

B

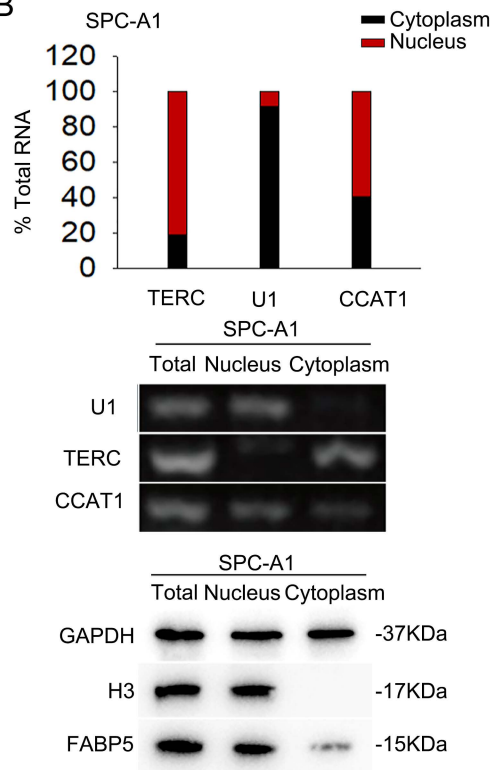

C

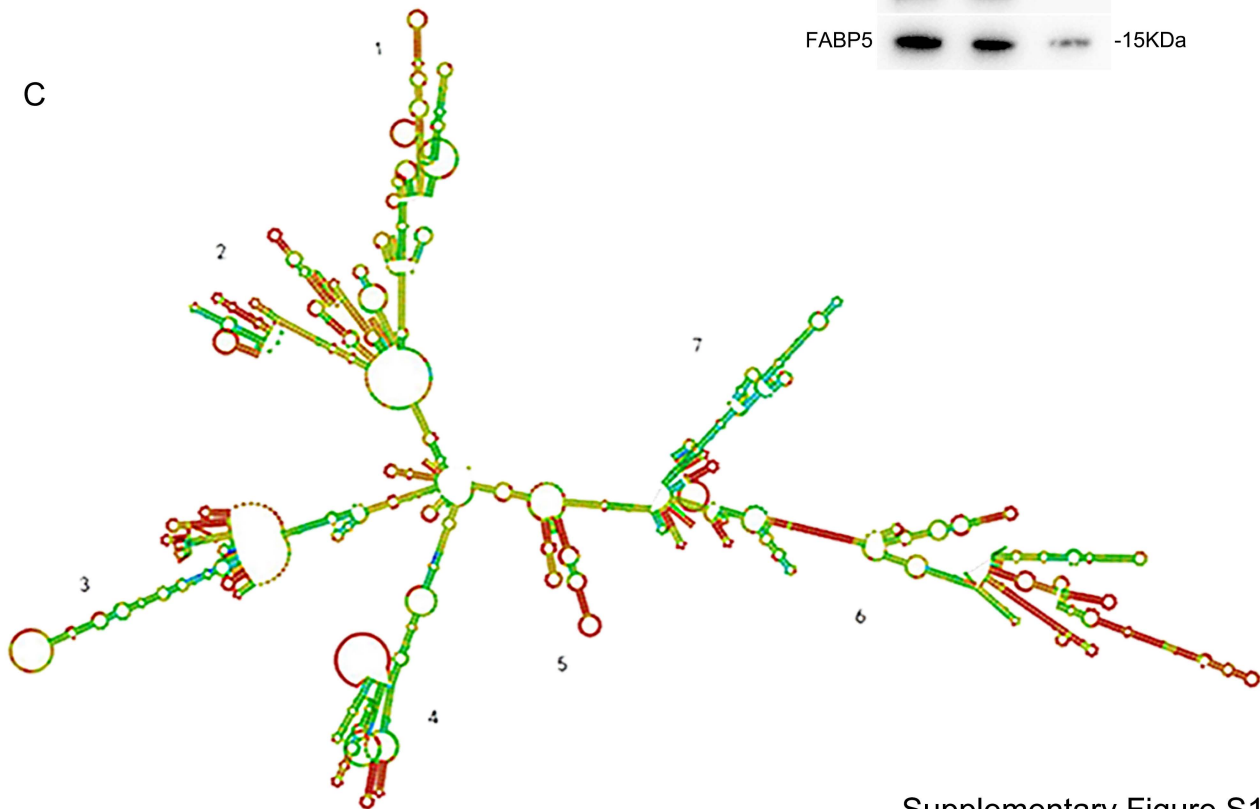

Supplement: JCMM-25-9199-s001.pdf [file JCMM-25-9199-s001.pdf]
